# Supplementary material for: Metformin Increases Sensitivity of Pancreatic Cancer Cells to Gemcitabine by Reducing CD133+ Cell Populations and Suppressing ERK/P70S6K Signaling
Source: PubMed Central journal article supplement (PMC4585731; doi:10.1038/srep14404), 2015-09-22
Supplement: srep14404-s1.pdf [file srep14404-s1.pdf]

**Title:** Metformin Increases Sensitivity of Pancreatic Cancer Cells to Gemcitabine by Reducing CD133<sup>+</sup> Cell Populations and Suppressing ERK/P70S6K Signaling

**Authors:**

Xinqun Chai<sup>1</sup>, Hongpeng Chu<sup>1</sup>, Xuan Yang<sup>1</sup>, Yuanpu Meng<sup>1</sup>, Pengfei Shi<sup>2</sup>, Shanmiao Gou<sup>3</sup>.

<sup>1</sup> Department of Hepatobiliary Surgery, Union Hospital, Tongji Medical College, Huazhong University of Science and Technology.

<sup>2</sup> Department of Breast and Thyroid Surgery, Central Hospital of Wuhan.

<sup>3</sup> Pancreatic Disease Institute, Union Hospital, Tongji Medical College, Huazhong University of Science and Technology.

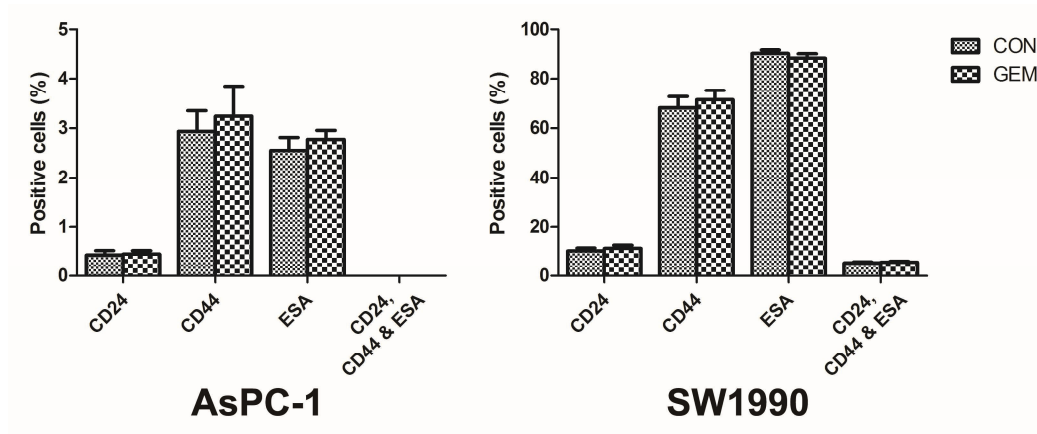

**Supplementary Figure S1. Gemcitabine didn't change the proportion of CD24<sup>+</sup>CD44<sup>+</sup>ESA<sup>+</sup> cells in pancreatic cancer cells.** AsPC-1 and SW1990 pancreatic cancer cells were treated with 300 nM gemcitabine for 48 h, and the proportion of CD24<sup>+</sup>, CD44<sup>+</sup>, ESA<sup>+</sup> and CD24<sup>+</sup>CD44<sup>+</sup>ESA<sup>+</sup> cells was determined by flow cytometry. Gemcitabine did not affect CD24<sup>+</sup>, CD44<sup>+</sup>, ESA<sup>+</sup> or CD24<sup>+</sup>CD44<sup>+</sup>ESA<sup>+</sup> cells (CD24<sup>+</sup>CD44<sup>+</sup>ESA<sup>+</sup> cells are not detectable among AsPC-1 cells). CON, control; GEM, gemcitabine.

Supplementary Table S1. Effect of gemcitabine on CD133<sup>+</sup> and CD133<sup>-</sup> pancreatic cancer cells

|        | Control                                                                                 |                                                                                |                                                                                | Gemcitabine (300 nM, 48 hours)                                                          |                                                                                |                                                                                |                                                                                     |                                                                                     |
|--------|-----------------------------------------------------------------------------------------|--------------------------------------------------------------------------------|--------------------------------------------------------------------------------|-----------------------------------------------------------------------------------------|--------------------------------------------------------------------------------|--------------------------------------------------------------------------------|-------------------------------------------------------------------------------------|-------------------------------------------------------------------------------------|
|        | <b>A:</b> Cell numbers<br>(relative to control,<br>mean $\pm$ standard<br>deviation, %) | <b>B:</b> CD133 <sup>+</sup><br>cells (mean $\pm$<br>standard<br>deviation, %) | <b>C:</b> CD133 <sup>-</sup><br>cells (mean $\pm$<br>standard<br>deviation, %) | <b>D:</b> Cell numbers<br>(relative to control,<br>mean $\pm$ standard<br>deviation, %) | <b>E:</b> CD133 <sup>+</sup><br>cells (mean $\pm$<br>standard<br>deviation, %) | <b>F:</b> CD133 <sup>-</sup><br>cells (mean $\pm$<br>standard<br>deviation, %) | <b>G:</b> Proportion of<br>survived CD133 <sup>+</sup><br>cells<br>((D*E)/(A*B), %) | <b>H:</b> Proportion of<br>survived CD133 <sup>-</sup><br>cells<br>((D*F)/(A*C), %) |
| AsPC-1 | 100 $\pm$ 2.83                                                                          | 5.18 $\pm$ 0.94                                                                | 94.82 $\pm$ 0.94                                                               | 40.73 $\pm$ 2.51                                                                        | 11.00 $\pm$ 2.34                                                               | 89.00 $\pm$ 2.34                                                               | <b>86.41</b>                                                                        | <b>38.23</b>                                                                        |
| SW1990 | 100 $\pm$ 2.51                                                                          | 4.38 $\pm$ 1.08                                                                | 95.62 $\pm$ 1.08                                                               | 31.33 $\pm$ 1.93                                                                        | 8.40 $\pm$ 1.70                                                                | 91.60 $\pm$ 1.70                                                               | <b>60.14</b>                                                                        | <b>30.02</b>                                                                        |

Supplementary Table S2. Correlation between 193 proteins and histological grade of pancreatic cancer using reverse phase protein array (RPPA)

| Protein                | CC      | 95% CI<br>(Lower) | 95% CI<br>(Upper) | P      | t       | df |
|------------------------|---------|-------------------|-------------------|--------|---------|----|
| beta                   | 0.0995  | -0.132            | 0.3207            | 0.3991 | 0.8482  | 72 |
| epsilon                | -0.026  | -0.253            | 0.2037            | 0.826  | -0.2207 | 72 |
| zeta                   | -0.0996 | -0.3208           | 0.1319            | 0.3986 | -0.8492 | 72 |
| 4E-BP1                 | -0.1277 | -0.3461           | 0.1039            | 0.2783 | -1.0923 | 72 |
| 4E-BP1_pS65            | -0.0936 | -0.3153           | 0.1379            | 0.4278 | -0.7975 | 72 |
| 4E-BP1_pT37_T46        | -0.0963 | -0.3178           | 0.1352            | 0.4143 | -0.8211 | 72 |
| 4E-BP1_pT70            | 0.0694  | -0.1616           | 0.2933            | 0.5567 | 0.5906  | 72 |
| 53BP1                  | 0.0697  | -0.1614           | 0.2935            | 0.5553 | 0.5926  | 72 |
| A-Raf_pS299            | -0.1267 | -0.3452           | 0.1048            | 0.2819 | -1.0842 | 72 |
| ACC_pS79               | 0.1251  | -0.1064           | 0.3438            | 0.2881 | 1.0701  | 72 |
| ACC1                   | -0.0121 | -0.24             | 0.217             | 0.9184 | -0.1028 | 72 |
| Acetyl-a-Tubulin-Lys40 | 0.0495  | -0.181            | 0.2749            | 0.6752 | 0.4207  | 72 |
| ACVRL1                 | -0.0371 | -0.2634           | 0.193             | 0.7534 | -0.3153 | 72 |
| ADAR1                  | 0.0071  | -0.2217           | 0.2352            | 0.952  | 0.0604  | 72 |
| Akt                    | 0.1417  | -0.0897           | 0.3586            | 0.2284 | 1.2149  | 72 |
| Akt_pS473              | 0.0888  | -0.1426           | 0.311             | 0.4518 | 0.7564  | 72 |
| Akt_pT308              | 0.0161  | -0.2132           | 0.2437            | 0.8918 | 0.1365  | 72 |
| alpha-Catenin          | -0.1482 | -0.3643           | 0.0832            | 0.2077 | -1.2712 | 72 |
| AMPK_alpha             | -0.0453 | -0.271            | 0.1851            | 0.7015 | -0.3848 | 72 |
| AMPK_pT172             | 0.2365  | 0.0085            | 0.4412            | 0.0425 | 2.0653  | 72 |
| Annexin-1              | 0.0695  | -0.1616           | 0.2933            | 0.5564 | 0.5909  | 72 |
| Annexin_VII            | -0.2238 | -0.4303           | 0.0049            | 0.0552 | -1.9489 | 72 |
| AR                     | 0.0851  | -0.1462           | 0.3076            | 0.471  | 0.7247  | 72 |
| ARHI                   | -0.1072 | -0.3277           | 0.1243            | 0.3631 | -0.9152 | 72 |
| ASNS                   | -0.0378 | -0.264            | 0.1923            | 0.749  | -0.3212 | 72 |
| ATM                    | 0.1152  | -0.1164           | 0.3348            | 0.3286 | 0.9837  | 72 |
| B-Raf                  | 0.1457  | -0.0856           | 0.3621            | 0.2155 | 1.2497  | 72 |
| Bad_pS112              | -0.0224 | -0.2496           | 0.2071            | 0.8496 | -0.1903 | 72 |
| Bak                    | 0.1118  | -0.1197           | 0.3318            | 0.3428 | 0.9549  | 72 |
| Bap1c-4                | 0.0735  | -0.1576           | 0.297             | 0.5337 | 0.6254  | 72 |
| Bax                    | 0.04    | -0.1903           | 0.266             | 0.7354 | 0.3393  | 72 |
| Bcl-2                  | -0.0054 | -0.2336           | 0.2234            | 0.9635 | -0.0459 | 72 |
| Bcl-xL                 | -0.0473 | -0.2729           | 0.1831            | 0.6888 | -0.4021 | 72 |
| Beclin                 | 0.0184  | -0.211            | 0.2459            | 0.8763 | 0.1562  | 72 |
| beta-Catenin           | 0.0541  | -0.1766           | 0.2791            | 0.6473 | 0.4594  | 72 |
| Bid                    | 0.1336  | -0.0979           | 0.3514            | 0.2563 | 1.1442  | 72 |
| Bim                    | 0.125   | -0.1066           | 0.3437            | 0.2887 | 1.0689  | 72 |
| BRCA2                  | 0.0867  | -0.1446           | 0.3091            | 0.4625 | 0.7388  | 72 |

|                       |         |         |           |        |         |    |
|-----------------------|---------|---------|-----------|--------|---------|----|
| c-Jun_pS73            | -0.1051 | -0.3258 | 0.1264    | 0.3729 | -0.8967 | 72 |
| c-Kit                 | -0.0837 | -0.3064 | 0.1476    | 0.4782 | -0.7129 | 72 |
| c-Met_pY1235          | -0.0802 | -0.3032 | 0.1511    | 0.4969 | -0.6828 | 72 |
| c-Myc                 | -0.2441 | -0.4477 | -0.0166   | 0.0361 | -2.1362 | 72 |
| C-Raf                 | 0.1563  | -0.0749 | 0.3715    | 0.1836 | 1.3428  | 72 |
| C-Raf_pS338           | -0.0187 | -0.2462 | 0.2107    | 0.8742 | -0.1589 | 72 |
| Caspase-7_cleavedD198 | 0.1411  | -0.0903 | 0.358     | 0.2305 | 1.2092  | 72 |
| Caveolin-1            | 0.0583  | -0.1725 | 0.283     | 0.6219 | 0.4953  | 72 |
| CD20                  | 0.1229  | -0.1086 | 0.3418    | 0.2968 | 1.051   | 72 |
| CD31                  | -0.0708 | -0.2946 | 0.1602    | 0.5486 | -0.6027 | 72 |
| CD49b                 | -0.0736 | -0.2971 | 0.1575    | 0.533  | -0.6265 | 72 |
| CDK1                  | -0.0896 | -0.3117 | 0.1418    | 0.4476 | -0.7635 | 72 |
| Chk1                  | 0.186   | -0.0444 | 0.3976    | 0.1126 | 1.6062  | 72 |
| Chk1_pS345            | -0.0871 | -0.3095 | 0.1442    | 0.4603 | -0.7423 | 72 |
| Chk2                  | -0.137  | -0.3544 | 0.0945    | 0.2445 | -1.1734 | 72 |
| Chk2_pT68             | -0.0824 | -0.3052 | 0.1489    | 0.485  | -0.7019 | 72 |
| cIAP                  | 0.0614  | -0.1695 | 0.2859    | 0.6034 | 0.5219  | 72 |
| Claudin-7             | -0.1579 | -0.373  | 0.0732    | 0.1789 | -1.3573 | 72 |
| Collagen_VI           | 0.0278  | -0.2019 | 0.2547    | 0.8139 | 0.2363  | 72 |
| Cyclin_B1             | 0.1054  | -0.1262 | 0.326     | 0.3716 | 0.8991  | 72 |
| Cyclin_D1             | 0.124   | -0.1075 | 0.3428    | 0.2923 | 1.0608  | 72 |
| Cyclin_E1             | 0.0576  | -0.1731 | 0.2824    | 0.6257 | 0.4899  | 72 |
| Cyclin_E2             | 0.0843  | -0.147  | 0.3069    | 0.4749 | 0.7182  | 72 |
| DJ-1                  | -0.2208 | -0.4277 | 0.0081    | 0.0587 | -1.9208 | 72 |
| Dvl3                  | 0.0329  | -0.1971 | 0.2594    | 0.7808 | 0.2793  | 72 |
| E-Cadherin            | -0.0309 | -0.2576 | 0.199     | 0.7935 | -0.2627 | 72 |
| eEF2                  | -0.0332 | -0.2597 | 0.1968    | 0.7791 | -0.2815 | 72 |
| eEF2K                 | -0.0382 | -0.2643 | 0.192     | 0.7469 | -0.324  | 72 |
| EGFR                  | 0.1643  | -0.0667 | 0.3786    | 0.1619 | 1.4134  | 72 |
| EGFR_pY1068           | -0.0328 | -0.2593 | 0.1972    | 0.7815 | -0.2784 | 72 |
| EGFR_pY1173           | 0.0618  | -0.1691 | 0.2863    | 0.6008 | 0.5256  | 72 |
| eIF4E                 | -0.2292 | -0.4349 | -8.00E-04 | 0.0495 | -1.9982 | 72 |
| eIF4G                 | 0.0714  | -0.1597 | 0.2951    | 0.5454 | 0.6076  | 72 |
| ER-alpha              | 0.1886  | -0.0417 | 0.3999    | 0.1076 | 1.6294  | 72 |
| ER-alpha_pS118        | 0.0934  | -0.138  | 0.3152    | 0.4285 | 0.7963  | 72 |
| ERCC1                 | 0.1383  | -0.0931 | 0.3556    | 0.24   | 1.1849  | 72 |
| ERK2                  | 0.0327  | -0.1973 | 0.2592    | 0.7823 | 0.2774  | 72 |
| ETS-1                 | 0.1862  | -0.0442 | 0.3977    | 0.1123 | 1.6077  | 72 |
| FASN                  | 0.0642  | -0.1667 | 0.2885    | 0.5867 | 0.546   | 72 |
| Fibronectin           | 0.1393  | -0.0921 | 0.3565    | 0.2365 | 1.1936  | 72 |
| FoxM1                 | 0.0224  | -0.2071 | 0.2497    | 0.8495 | 0.1904  | 72 |
| FOXO3a                | -0.1608 | -0.3755 | 0.0703    | 0.1711 | -1.3825 | 72 |
| FOXO3a_pS318_S321     | -0.1412 | -0.3582 | 0.0902    | 0.23   | -1.2106 | 72 |
| G6PD                  | -0.0234 | -0.2505 | 0.2062    | 0.8434 | -0.1982 | 72 |

|                         |           |         |        |        |         |    |
|-------------------------|-----------|---------|--------|--------|---------|----|
| Gab2                    | 0.0842    | -0.1471 | 0.3068 | 0.4758 | 0.7168  | 72 |
| GAPDH                   | 0.0393    | -0.1909 | 0.2654 | 0.7394 | 0.334   | 72 |
| GATA3                   | 0.1152    | -0.1164 | 0.3348 | 0.3286 | 0.9837  | 72 |
| GSK3-alpha-beta         | -0.0489   | -0.2743 | 0.1816 | 0.6791 | -0.4153 | 72 |
| GSK3-alpha-beta_pS21_S9 | -0.0018   | -0.2302 | 0.2268 | 0.9876 | -0.0156 | 72 |
| GSK3_pS9                | 0.0912    | -0.1402 | 0.3132 | 0.4397 | 0.7771  | 72 |
| HER2                    | 0.0602    | -0.1706 | 0.2848 | 0.6102 | 0.5121  | 72 |
| HER2_pY1248             | 0.0261    | -0.2037 | 0.253  | 0.8256 | 0.2212  | 72 |
| HER3                    | 0.0759    | -0.1553 | 0.2992 | 0.5204 | 0.6459  | 72 |
| HER3_pY1289             | 0.0299    | -0.1999 | 0.2567 | 0.8002 | 0.254   | 72 |
| Heregulin               | 0.1615    | -0.0695 | 0.3761 | 0.1692 | 1.3888  | 72 |
| HSP70                   | 0.1496    | -0.0817 | 0.3656 | 0.2033 | 1.284   | 72 |
| IGFBP2                  | -0.1047   | -0.3254 | 0.1268 | 0.3746 | -0.8935 | 72 |
| INPP4B                  | 0.0343    | -0.1957 | 0.2607 | 0.7718 | 0.2911  | 72 |
| IRS1                    | 0.1536    | -0.0776 | 0.3691 | 0.1914 | 1.3188  | 72 |
| JNK_pT183_pY185         | -0.0196   | -0.247  | 0.2098 | 0.868  | -0.1668 | 72 |
| JNK2                    | 8.00E-04  | -0.2277 | 0.2293 | 0.9944 | 0.007   | 72 |
| Ku80                    | 0.0887    | -0.1427 | 0.3109 | 0.4522 | 0.7559  | 72 |
| Lck                     | 0.0926    | -0.1388 | 0.3145 | 0.4326 | 0.7892  | 72 |
| LKB1                    | -0.019    | -0.2464 | 0.2105 | 0.8726 | -0.1609 | 72 |
| MAPK_pT202_Y204         | 0.047     | -0.1835 | 0.2726 | 0.6908 | 0.3994  | 72 |
| MEK1                    | -0.0286   | -0.2554 | 0.2012 | 0.8088 | -0.2429 | 72 |
| MEK1_pS217_S221         | 0.0043    | -0.2244 | 0.2326 | 0.9711 | 0.0364  | 72 |
| MIG-6                   | -2.00E-04 | -0.2287 | 0.2283 | 0.9984 | -0.002  | 72 |
| Mre11                   | 0.048     | -0.1825 | 0.2735 | 0.6844 | 0.4081  | 72 |
| MSH2                    | 0.1119    | -0.1197 | 0.3319 | 0.3426 | 0.9553  | 72 |
| MSH6                    | 0.1509    | -0.0803 | 0.3668 | 0.1992 | 1.2956  | 72 |
| mTOR                    | 0.0309    | -0.199  | 0.2576 | 0.794  | 0.2621  | 72 |
| mTOR_pS2448             | 0.0625    | -0.1684 | 0.2869 | 0.5968 | 0.5313  | 72 |
| MYH11                   | 0.0183    | -0.2111 | 0.2457 | 0.8772 | 0.155   | 72 |
| Myosin-IIa-pS1943       | -0.0107   | -0.2387 | 0.2183 | 0.9276 | -0.0911 | 72 |
| N-Cadherin              | 0.1432    | -0.0882 | 0.3599 | 0.2235 | 1.2278  | 72 |
| N-Ras                   | 0.1115    | -0.1201 | 0.3315 | 0.3443 | 0.952   | 72 |
| NDRG1_pT346             | 0.0382    | -0.192  | 0.2644 | 0.7468 | 0.3241  | 72 |
| NF-kB-p65_pS536         | 0.1331    | -0.0983 | 0.351  | 0.2581 | 1.1399  | 72 |
| NF2                     | 0.0088    | -0.2201 | 0.2368 | 0.9407 | 0.0747  | 72 |
| Notch1                  | 0.0599    | -0.1709 | 0.2845 | 0.612  | 0.5094  | 72 |
| P-Cadherin              | 0.12      | -0.1116 | 0.3392 | 0.3085 | 1.0256  | 72 |
| p21                     | 0.088     | -0.1434 | 0.3102 | 0.4561 | 0.7493  | 72 |
| p27                     | -0.0203   | -0.2477 | 0.2092 | 0.8637 | -0.1723 | 72 |
| p27_pT157               | -0.0291   | -0.2559 | 0.2007 | 0.8055 | -0.2472 | 72 |
| p27_pT198               | -0.0561   | -0.281  | 0.1747 | 0.6352 | -0.4765 | 72 |
| p38                     | 0.0706    | -0.1605 | 0.2943 | 0.5502 | 0.6003  | 72 |
| p38_pT180_Y182          | -0.0437   | -0.2696 | 0.1866 | 0.7113 | -0.3716 | 72 |

|                      |          |          |        |        |         |    |
|----------------------|----------|----------|--------|--------|---------|----|
| p53                  | -0.0641  | -0.2884  | 0.1669 | 0.5876 | -0.5448 | 72 |
| p62-LCK-ligand       | 0.1677   | -0.0632  | 0.3816 | 0.1532 | 1.4434  | 72 |
| p70S6K               | 0.0966   | -0.1348  | 0.3181 | 0.4128 | 0.8238  | 72 |
| p70S6K_pT389         | 0.2292   | 7.00E-04 | 0.4349 | 0.0495 | 1.998   | 72 |
| p90RSK               | 0.0554   | -0.1753  | 0.2803 | 0.6394 | 0.4706  | 72 |
| p90RSK_pT359_S363    | 0.0765   | -0.1547  | 0.2998 | 0.517  | 0.6513  | 72 |
| PAI-1                | 0.1024   | -0.1291  | 0.3233 | 0.3853 | 0.8734  | 72 |
| Paxillin             | 0.1432   | -0.0882  | 0.3599 | 0.2235 | 1.2278  | 72 |
| PCNA                 | -0.0594  | -0.2841  | 0.1714 | 0.6151 | -0.505  | 72 |
| PDCD4                | -0.1865  | -0.398   | 0.0439 | 0.1116 | -1.6106 | 72 |
| PDK1                 | 0.0211   | -0.2084  | 0.2484 | 0.8586 | 0.1788  | 72 |
| PDK1_pS241           | -0.0512  | -0.2765  | 0.1794 | 0.6646 | -0.4353 | 72 |
| PEA15                | -0.133   | -0.3508  | 0.0985 | 0.2587 | -1.1385 | 72 |
| PEA15_pS116          | 0.1255   | -0.106   | 0.3441 | 0.2867 | 1.0734  | 72 |
| PI3K-p110-alpha      | -0.0105  | -0.2384  | 0.2185 | 0.9292 | -0.0891 | 72 |
| PI3K-p85             | 0.0506   | -0.18    | 0.2759 | 0.6685 | 0.43    | 72 |
| PKC-alpha            | -0.1195  | -0.3388  | 0.1121 | 0.3105 | -1.0213 | 72 |
| PKC-alpha_pS657      | -0.0436  | -0.2694  | 0.1868 | 0.7123 | -0.3702 | 72 |
| PKC-delta_pS664      | 0.0077   | -0.2212  | 0.2358 | 0.948  | 0.0654  | 72 |
| PKC-pan_BetaII_pS660 | 0.0062   | -0.2226  | 0.2343 | 0.9583 | 0.0524  | 72 |
| PR                   | -0.0534  | -0.2785  | 0.1772 | 0.6512 | -0.454  | 72 |
| PRAS40_pT246         | 0.0379   | -0.1923  | 0.2641 | 0.7486 | 0.3217  | 72 |
| PRDX1                | -0.1545  | -0.37    | 0.0767 | 0.1886 | -1.3273 | 72 |
| PREX1                | -0.0277  | -0.2546  | 0.2021 | 0.815  | -0.2349 | 72 |
| PTEN                 | 0.0412   | -0.189   | 0.2672 | 0.7272 | 0.3502  | 72 |
| Rab11                | 0.1243   | -0.1073  | 0.343  | 0.2915 | 1.0627  | 72 |
| Rab25                | -0.1367  | -0.3541  | 0.0947 | 0.2455 | -1.171  | 72 |
| Rad50                | 0.0385   | -0.1917  | 0.2646 | 0.7448 | 0.3267  | 72 |
| Rad51                | 0.0999   | -0.1316  | 0.3211 | 0.3971 | 0.8519  | 72 |
| Raptor               | -0.0169  | -0.2444  | 0.2124 | 0.8865 | -0.1433 | 72 |
| Rb-M-QC              | -0.1813  | -0.3935  | 0.0492 | 0.1221 | -1.5643 | 72 |
| Rb_pS807_S811        | -0.0207  | -0.248   | 0.2088 | 0.861  | -0.1758 | 72 |
| RBM15                | 0.102    | -0.1295  | 0.323  | 0.3872 | 0.87    | 72 |
| Rictor               | 0.1098   | -0.1218  | 0.33   | 0.3518 | 0.9372  | 72 |
| Rictor_pT1135        | 0.0851   | -0.1462  | 0.3076 | 0.4709 | 0.7248  | 72 |
| S6                   | -0.064   | -0.2883  | 0.167  | 0.5882 | -0.5439 | 72 |
| S6_pS235_S236        | 7.00E-04 | -0.2279  | 0.2291 | 0.9956 | 0.0056  | 72 |
| S6_pS240_S244        | 0.0354   | -0.1947  | 0.2617 | 0.7649 | 0.3002  | 72 |
| SCD1                 | -0.209   | -0.4176  | 0.0204 | 0.0739 | -1.8137 | 72 |
| SF2                  | -0.0265  | -0.2534  | 0.2032 | 0.8228 | -0.2248 | 72 |
| Shc_pY317            | -0.0874  | -0.3097  | 0.1439 | 0.4589 | -0.7447 | 72 |
| Smad1                | 0.0645   | -0.1664  | 0.2888 | 0.5848 | 0.5488  | 72 |
| Smad3                | 0.1242   | -0.1074  | 0.3429 | 0.2919 | 1.0619  | 72 |
| Smad4                | 0.042    | -0.1883  | 0.2679 | 0.7226 | 0.3564  | 72 |

|                  |           |         |        |        |          |    |
|------------------|-----------|---------|--------|--------|----------|----|
| Src              | -0.1168   | -0.3363 | 0.1148 | 0.3219 | -0.9975  | 72 |
| Src_pY416        | -0.0894   | -0.3115 | 0.142  | 0.4487 | -0.7617  | 72 |
| Src_pY527        | -0.0362   | -0.2625 | 0.1939 | 0.7595 | -0.3073  | 72 |
| STAT3_pY705      | 0.0584    | -0.1724 | 0.2832 | 0.6209 | 0.4967   | 72 |
| STAT5-alpha      | 0.1285    | -0.103  | 0.3468 | 0.2752 | 1.0996   | 72 |
| Stathmin         | 0.037     | -0.1931 | 0.2633 | 0.7544 | 0.314    | 72 |
| Syk              | -0.0153   | -0.2429 | 0.214  | 0.8973 | -0.1295  | 72 |
| TAZ              | 0.1077    | -0.1239 | 0.3281 | 0.3612 | 0.9189   | 72 |
| TIGAR            | -9.00E-04 | -0.2293 | 0.2277 | 0.9942 | -0.0073  | 72 |
| Transglutaminase | 0.126     | -0.1056 | 0.3446 | 0.2849 | 1.0775   | 72 |
| TFRC             | -0.0169   | -0.2445 | 0.2124 | 0.886  | -0.1438  | 72 |
| TSC1             | 0.0496    | -0.181  | 0.275  | 0.6748 | 0.4213   | 72 |
| TTF1             | 0.1042    | -0.1274 | 0.3249 | 0.3772 | 0.8886   | 72 |
| Tuberin          | 0.1071    | -0.1244 | 0.3276 | 0.3635 | 0.9145   | 72 |
| Tuberin_pT1462   | -0.0174   | -0.2449 | 0.212  | 0.8833 | -0.1473  | 72 |
| VEGFR2           | 0.0618    | -0.1691 | 0.2863 | 0.6008 | 0.5256   | 72 |
| VHL              | 0.0606    | -0.1703 | 0.2851 | 0.6082 | 0.5149   | 72 |
| XBP1             | 0.0905    | -0.1409 | 0.3125 | 0.4433 | 0.7709   | 72 |
| XRCC1            | -0.1005   | -0.3216 | 0.131  | 0.3943 | -0.8571  | 72 |
| YAP              | 1.00E-04  | -0.2284 | 0.2286 | 0.9994 | 8.00E-04 | 72 |
| YAP_pS127        | -0.0602   | -0.2848 | 0.1707 | 0.6106 | -0.5115  | 72 |
| YB-1             | -0.1665   | -0.3806 | 0.0644 | 0.1561 | -1.4331  | 72 |
| YB-1_pS102       | -0.0415   | -0.2675 | 0.1888 | 0.7256 | -0.3524  | 72 |

---

CC, correlation coefficient; CI, confidence interval; df, degree of freedom.
